# Supplementary material for: A new insight into the thermodynamical criterion for the preparation of semiconductor and metal nanocrystals using a polymerized complexing method
Source: Royal Society of Chemistry journal article supplement (doi:10.1039/c7cp04097k), 2017-01-01
Supplement: c7cp04097k1.pdf [file c7cp04097k1.pdf]

## Supplementary materials

# A New Insight into Thermodynamical Criterion for Preparation of Semiconductor and Metal Nanocrystals using Polymerized Complexing method

*Pingyun Li<sup>\*a</sup>, Qingqing Wang<sup>a</sup>, Guodong Deng<sup>a</sup>, Xiaode Guo<sup>a</sup>, Wei Jiang<sup>a</sup>, Hongying Liu<sup>a</sup>, Fengsheng Li<sup>a</sup>, and Nguyễn Thị Kim Thanh<sup>\*b,c</sup>*

<sup>a</sup>National Special Superfine Powder Engineering Research Center, School of Chemical Engineering, Nanjing University of Science and Technology, Nanjing 210094, China.

<sup>b</sup>Biophysics Group, Department of Physics and Astronomy, University College London, London WC1E 6BT, United Kingdom

<sup>c</sup>UCL Healthcare Biomagnetic and Nanomaterials Laboratories, London W1S 4BS, United Kingdom

Corresponding Authors: lpyljr@126.com (Pingyun Li); ntk.thanh@ucl.ac.uk (Nguyễn Thị Kim Thanh)

**Table S1. Experimental conditions for preparation of different NCs**

---

| Product | Initial chemical agents                                                             |
|---------|-------------------------------------------------------------------------------------|
| Ni      | Ni(NO <sub>3</sub> ) <sub>2</sub> ·6H <sub>2</sub> O, gelatin, PVP, DW              |
| Ni      | Ni(NO <sub>3</sub> ) <sub>2</sub> ·6H <sub>2</sub> O, arabinose, PVP, DW            |
| Ni      | Ni(NO <sub>3</sub> ) <sub>2</sub> ·6H <sub>2</sub> O, trehalose, PVP, DW            |
| Ni      | Ni(NO <sub>3</sub> ) <sub>2</sub> ·6H <sub>2</sub> O, inulin, PVP, DW               |
| Ni      | Ni(NO <sub>3</sub> ) <sub>2</sub> ·6H <sub>2</sub> O, raffinose, PVP, DW            |
| Ag      | AgNO <sub>3</sub> , gelatin, Tween20, DW                                            |
| Cu      | Cu(CH <sub>3</sub> COO) <sub>2</sub> ·6H <sub>2</sub> O, gelatin, PVP, DW           |
| Te      | H <sub>6</sub> TeO <sub>6</sub> , gelatin, PVP, DW                                  |
| Te      | H <sub>6</sub> TeO <sub>6</sub> , CA, PVP, DW                                       |
| Te      | H <sub>6</sub> TeO <sub>6</sub> , starch, PVP, DW                                   |
| Te      | H <sub>6</sub> TeO <sub>6</sub> , Coca-Cola, PVP, DW                                |
| Te      | H <sub>6</sub> TeO <sub>6</sub> , Sprite, PVP, DW                                   |
| Bi      | Bi(NO <sub>3</sub> ) <sub>3</sub> ·5H <sub>2</sub> O, gelatin, PVP, EG              |
| Bi      | Bi(NO <sub>3</sub> ) <sub>3</sub> ·5H <sub>2</sub> O, CA, PVP, EG                   |
| Bi      | Bi(NO <sub>3</sub> ) <sub>3</sub> ·5H <sub>2</sub> O, acrylamide, PVP, EG           |
| Bi      | Bi(NO <sub>3</sub> ) <sub>3</sub> ·5H <sub>2</sub> O, nitric acid, glucose, PVP, DW |
| Sb      | Sb(CH <sub>3</sub> COO) <sub>3</sub> , gelatin, PVP, EG                             |
| Sb      | Sb(CH <sub>3</sub> COO) <sub>3</sub> , CA, PVP, EG                                  |
| Co      | Co(NO <sub>3</sub> ) <sub>2</sub> ·6H <sub>2</sub> O, CA, PVP, DW                   |
| Co      | Co(NO <sub>3</sub> ) <sub>2</sub> ·6H <sub>2</sub> O, starch, PVP, DW               |

---

---

|                                 |                                                                                                                 |
|---------------------------------|-----------------------------------------------------------------------------------------------------------------|
| Co                              | Co(NO <sub>3</sub> ) <sub>2</sub> ·6H <sub>2</sub> O, EDTA, PVP, DW                                             |
| Co                              | Co(NO <sub>3</sub> ) <sub>2</sub> ·6H <sub>2</sub> O, ascorbic acid, PVP, DW                                    |
| Co                              | Co(NO <sub>3</sub> ) <sub>2</sub> ·6H <sub>2</sub> O, glucose, PVP, DW                                          |
| Co                              | Co(NO <sub>3</sub> ) <sub>2</sub> ·6H <sub>2</sub> O, sucrose, PVP, DW                                          |
| Co                              | Co(NO <sub>3</sub> ) <sub>2</sub> ·6H <sub>2</sub> O, sucrose, PVP, DW                                          |
| Co                              | Co(NO <sub>3</sub> ) <sub>2</sub> ·6H <sub>2</sub> O, EG, PVP, DW                                               |
| Cd                              | Cd(CH <sub>3</sub> COO) <sub>2</sub> ·3H <sub>2</sub> O, glucose, PVP, DW                                       |
| Sn                              | SnCl <sub>4</sub> ·5H <sub>2</sub> O, glucose, PVP, DW                                                          |
| CdTe                            | Cd(CH <sub>3</sub> COO) <sub>2</sub> ·3H <sub>2</sub> O, H <sub>6</sub> TeO <sub>6</sub> , gelatin, PVP, DW     |
| CdTe                            | Cd(CH <sub>3</sub> COO) <sub>2</sub> ·3H <sub>2</sub> O, H <sub>6</sub> TeO <sub>6</sub> , CA, PVP, DW          |
| CdTe                            | Cd(CH <sub>3</sub> COO) <sub>2</sub> ·3H <sub>2</sub> O, H <sub>6</sub> TeO <sub>6</sub> , gelatin, Tween20, EG |
| Bi-Sb                           | Bi(NO <sub>3</sub> ) <sub>3</sub> ·5H <sub>2</sub> O, Sb(CH <sub>3</sub> COO) <sub>3</sub> , CA, PVP, EG        |
| Bi-Sb                           | Bi(NO <sub>3</sub> ) <sub>3</sub> ·5H <sub>2</sub> O, Sb(CH <sub>3</sub> COO) <sub>3</sub> , gelatin, PVP, EG   |
| NiTe <sub>1.5</sub>             | Ni(NO <sub>3</sub> ) <sub>2</sub> ·6H <sub>2</sub> O, H <sub>6</sub> TeO <sub>6</sub> , gelatin, PVP, DW        |
| NiTe <sub>1.5</sub>             | Ni(NO <sub>3</sub> ) <sub>2</sub> ·6H <sub>2</sub> O, H <sub>6</sub> TeO <sub>6</sub> , CA, PVP, DW             |
| NiTe <sub>1.5</sub>             | Ni(NO <sub>3</sub> ) <sub>2</sub> ·6H <sub>2</sub> O, H <sub>6</sub> TeO <sub>6</sub> , CA, PVP, EG             |
| Ag <sub>2</sub> Te              | AgNO <sub>3</sub> , H <sub>6</sub> TeO <sub>6</sub> , gelatin, Tween 20, DW                                     |
| CuTe                            | Cu(CH <sub>3</sub> COO) <sub>2</sub> ·6H <sub>2</sub> O, H <sub>6</sub> TeO <sub>6</sub> , CA, PVP, DW          |
| Sb <sub>2</sub> Te <sub>3</sub> | Sb(CH <sub>3</sub> COO) <sub>3</sub> , H <sub>6</sub> TeO <sub>6</sub> , CA, PVP, EG                            |
| Bi <sub>2</sub> Te <sub>3</sub> | Bi(NO <sub>3</sub> ) <sub>3</sub> ·5H <sub>2</sub> O, CA, PVP, EG                                               |
| Bi <sub>2</sub> Te <sub>3</sub> | Bi(NO <sub>3</sub> ) <sub>3</sub> ·5H <sub>2</sub> O, H <sub>6</sub> TeO <sub>6</sub> , gelatin, PVP, EG        |
| In <sub>2</sub> Te <sub>3</sub> | In(NO <sub>3</sub> ) <sub>3</sub> , H <sub>6</sub> TeO <sub>6</sub> , CA, PVP, DW                               |

---

---

|                                     |                                                                                                                                                                |
|-------------------------------------|----------------------------------------------------------------------------------------------------------------------------------------------------------------|
| CoTe <sub>1.5</sub>                 | Co(NO <sub>3</sub> ) <sub>2</sub> ·6H <sub>2</sub> O, H <sub>6</sub> TeO <sub>6</sub> , gelatin, PVP, DW                                                       |
| SnSb                                | SnCl <sub>4</sub> ·5H <sub>2</sub> O, Sb(CH <sub>3</sub> COO) <sub>3</sub> , CA, PVP, EG                                                                       |
| SnTe                                | SnCl <sub>4</sub> ·5H <sub>2</sub> O, H <sub>6</sub> TeO <sub>6</sub> , CA, PVP, DW                                                                            |
| SnTe                                | SnCl <sub>4</sub> ·5H <sub>2</sub> O, H <sub>6</sub> TeO <sub>6</sub> , gelatin, PVP, DW                                                                       |
| CdS                                 | Cd(CH <sub>3</sub> COO) <sub>2</sub> ·3H <sub>2</sub> O, thiocarbamide, CA, PVP, DW                                                                            |
| Ni <sub>2.9</sub> SnTe <sub>2</sub> | Ni(NO <sub>3</sub> ) <sub>2</sub> ·6H <sub>2</sub> O, SnCl <sub>4</sub> , H <sub>6</sub> TeO <sub>6</sub> , CA, PVP, DW                                        |
| CuInS <sub>2</sub>                  | Cu(CH <sub>3</sub> COO) <sub>2</sub> ·6H <sub>2</sub> O, In(NO <sub>3</sub> ) <sub>3</sub> , thiocarbamide, EDTA,<br>PVP, DW                                   |
| CuInS <sub>2</sub>                  | Cu(CH <sub>3</sub> COO) <sub>2</sub> ·6H <sub>2</sub> O, In(NO <sub>3</sub> ) <sub>3</sub> , thiocarbamide, CA, PVP,<br>EG                                     |
| CuGaTe <sub>2</sub>                 | Cu(CH <sub>3</sub> COO) <sub>2</sub> ·6H <sub>2</sub> O, Ga(NO <sub>3</sub> ) <sub>3</sub> ·H <sub>2</sub> O, H <sub>6</sub> TeO <sub>6</sub> , CA, PVP,<br>DW |

---

**Table S2. Electronegativity of elements (Pauling)**

|             |             |             |             |             |             |             |             |             |             |             |             |             |             |             |             |             |
|-------------|-------------|-------------|-------------|-------------|-------------|-------------|-------------|-------------|-------------|-------------|-------------|-------------|-------------|-------------|-------------|-------------|
| <b>H</b>    |             |             |             |             |             |             |             |             |             |             |             |             |             |             |             |             |
| <b>2.18</b> |             |             |             |             |             |             |             |             |             |             |             |             |             |             |             |             |
| <b>Li</b>   | <b>Be</b>   |             |             |             |             |             |             |             |             |             |             | <b>B</b>    | <b>C</b>    | <b>N</b>    | <b>O</b>    | <b>F</b>    |
| <b>0.98</b> | <b>1.57</b> |             |             |             |             |             |             |             |             |             |             | <b>2.04</b> | <b>2.55</b> | <b>3.04</b> | <b>3.44</b> | <b>3.98</b> |
| <b>Na</b>   | <b>Mg</b>   |             |             |             |             |             |             |             |             |             |             | <b>Al</b>   | <b>Si</b>   | <b>P</b>    | <b>S</b>    | <b>Cl</b>   |
| <b>0.93</b> | <b>1.31</b> |             |             |             |             |             |             |             |             |             |             | <b>1.61</b> | <b>1.90</b> | <b>2.19</b> | <b>2.58</b> | <b>3.16</b> |
| <b>K</b>    | <b>Ca</b>   | <b>Sc</b>   | <b>Ti</b>   | <b>V</b>    | <b>Cr</b>   | <b>Mn</b>   | <b>Fe</b>   | <b>Co</b>   | <b>Ni</b>   | <b>Cu</b>   | <b>Zn</b>   | <b>Ga</b>   | <b>Ge</b>   | <b>As</b>   | <b>Se</b>   | <b>Br</b>   |
| <b>0.82</b> | <b>1.00</b> | <b>1.36</b> | <b>1.54</b> | <b>1.63</b> | <b>1.66</b> | <b>1.55</b> | <b>1.8</b>  | <b>1.88</b> | <b>1.91</b> | <b>1.90</b> | <b>1.65</b> | <b>1.81</b> | <b>2.01</b> | <b>2.18</b> | <b>2.55</b> | <b>2.96</b> |
| <b>Rb</b>   | <b>Sr</b>   | <b>Y</b>    | <b>Zr</b>   | <b>Nb</b>   | <b>Mo</b>   | <b>Tc</b>   | <b>Ru</b>   | <b>Rh</b>   | <b>Pd</b>   | <b>Ag</b>   | <b>Cd</b>   | <b>In</b>   | <b>Sn</b>   | <b>Sb</b>   | <b>Te</b>   | <b>I</b>    |
| <b>0.82</b> | <b>0.95</b> | <b>1.22</b> | <b>1.33</b> | <b>1.60</b> | <b>2.16</b> | <b>1.9</b>  | <b>2.28</b> | <b>2.2</b>  | <b>2.20</b> | <b>1.93</b> | <b>1.69</b> | <b>1.78</b> | <b>1.96</b> | <b>2.05</b> | <b>2.10</b> | <b>2.66</b> |
| <b>Cs</b>   | <b>Ba</b>   | <b>Lu</b>   | <b>Hf</b>   | <b>Ta</b>   | <b>W</b>    | <b>Re</b>   | <b>Os</b>   | <b>Ir</b>   | <b>Pt</b>   | <b>Au</b>   | <b>Hg</b>   | <b>Tl</b>   | <b>Pb</b>   | <b>Bi</b>   | <b>Po</b>   | <b>At</b>   |
| <b>0.79</b> | <b>0.89</b> | <b>1.2</b>  | <b>1.3</b>  | <b>1.5</b>  | <b>2.36</b> | <b>1.9</b>  | <b>2.2</b>  | <b>2.2</b>  | <b>2.28</b> | <b>2.54</b> | <b>2.00</b> | <b>2.04</b> | <b>2.33</b> | <b>2.02</b> | <b>2.0</b>  | <b>2.2</b>  |

**Table S3. Electronegativity of elements (Allred-Rochow)**

|             |             |             |             |             |             |             |             |             |             |             |             |             |             |             |             |             |
|-------------|-------------|-------------|-------------|-------------|-------------|-------------|-------------|-------------|-------------|-------------|-------------|-------------|-------------|-------------|-------------|-------------|
| <b>H</b>    |             |             |             |             |             |             |             |             |             |             |             |             |             |             |             |             |
| <b>2.20</b> |             |             |             |             |             |             |             |             |             |             |             |             |             |             |             |             |
| <b>Li</b>   | <b>Be</b>   |             |             |             |             |             |             |             |             |             |             | <b>B</b>    | <b>C</b>    | <b>N</b>    | <b>O</b>    | <b>F</b>    |
| <b>0.97</b> | <b>1.47</b> |             |             |             |             |             |             |             |             |             |             | <b>2.01</b> | <b>2.50</b> | <b>3.07</b> | <b>3.50</b> | <b>3.40</b> |
| <b>Na</b>   | <b>Mg</b>   |             |             |             |             |             |             |             |             |             |             | <b>Al</b>   | <b>Si</b>   | <b>P</b>    | <b>S</b>    | <b>Cl</b>   |
| <b>1.01</b> | <b>1.23</b> |             |             |             |             |             |             |             |             |             |             | <b>1.47</b> | <b>1.74</b> | <b>2.06</b> | <b>2.44</b> | <b>3.61</b> |
| <b>K</b>    | <b>Ca</b>   | <b>Sc</b>   | <b>Ti</b>   | <b>V</b>    | <b>Cr</b>   | <b>Mn</b>   | <b>Fe</b>   | <b>Co</b>   | <b>Ni</b>   | <b>Cu</b>   | <b>Zn</b>   | <b>Ga</b>   | <b>Ge</b>   | <b>As</b>   | <b>Se</b>   | <b>Br</b>   |
| <b>0.91</b> | <b>1.04</b> | <b>1.20</b> | <b>1.32</b> | <b>1.45</b> | <b>1.56</b> | <b>1.60</b> | <b>1.64</b> | <b>1.75</b> | <b>1.75</b> | <b>1.75</b> | <b>1.66</b> | <b>1.82</b> | <b>2.02</b> | <b>2.20</b> | <b>2.48</b> | <b>3.36</b> |
| <b>Rb</b>   | <b>Sr</b>   | <b>Y</b>    | <b>Zr</b>   | <b>Nb</b>   | <b>Mo</b>   | <b>Tc</b>   | <b>Ru</b>   | <b>Rh</b>   | <b>Pd</b>   | <b>Ag</b>   | <b>Cd</b>   | <b>In</b>   | <b>Sn</b>   | <b>Sb</b>   | <b>Te</b>   | <b>I</b>    |
| <b>0.89</b> | <b>0.99</b> | <b>1.11</b> | <b>1.22</b> | <b>1.23</b> | <b>1.30</b> | <b>1.36</b> | <b>1.42</b> | <b>1.14</b> | <b>1.35</b> | <b>1.42</b> | <b>1.46</b> | <b>1.49</b> | <b>1.72</b> | <b>1.82</b> | <b>2.01</b> | <b>3.06</b> |
| <b>Cs</b>   | <b>Ba</b>   | <b>Lu</b>   | <b>Hf</b>   | <b>Ta</b>   | <b>W</b>    | <b>Re</b>   | <b>Os</b>   | <b>Ir</b>   | <b>Pt</b>   | <b>Au</b>   | <b>Hg</b>   | <b>Tl</b>   | <b>Pb</b>   | <b>Bi</b>   | <b>Po</b>   | <b>At</b>   |
| <b>0.86</b> | <b>0.97</b> | <b>1.08</b> | <b>1.23</b> | <b>1.33</b> | <b>1.40</b> | <b>1.46</b> | <b>1.52</b> | <b>1.44</b> | <b>1.44</b> | <b>1.42</b> | <b>1.44</b> | <b>1.44</b> | <b>1.55</b> | <b>1.67</b> | <b>1.76</b> | <b>2.80</b> |

**Table S4. Electrode Potential of metallic ions at room temperature (Unit:**

**Voltage)**

---

|                                                                                                            |        |
|------------------------------------------------------------------------------------------------------------|--------|
| $2\text{H}^+ + 2\text{e}^- = \text{H}_2$                                                                   | 0.0000 |
| $\text{Cd}^{2+} + 2\text{e}^- = \text{Cd}$                                                                 | -0.403 |
| $\text{In}^{3+} + 3\text{e}^- = \text{In}$                                                                 | -0.338 |
| $\text{Co}^{2+} + 2\text{e}^- = \text{Co}$                                                                 | -0.282 |
| $\text{Ni}^{2+} + 2\text{e}^- = \text{Ni}$                                                                 | -0.257 |
| $\text{Sn}^{2+} + 2\text{e}^- = \text{Sn}$                                                                 | -0.138 |
| $\text{Sn}^{4+} + 4\text{e}^- = \text{Sn}$                                                                 | 0.008  |
| $\text{SbO}^+ + 2\text{H}^+ + 3\text{e}^- = \text{Sb} + \text{H}_2\text{O}$                                | 0.204  |
| $\text{Bi}^{3+} + 3\text{e}^- = \text{Bi}$                                                                 | 0.317  |
| $\text{Cu}^{2+} + 2\text{e}^- = \text{Cu}$                                                                 | 0.340  |
| $\text{TeO}_2(\text{s}) + 4\text{H}^+ + 4\text{e}^- = \text{Te}(\text{s}) + 2\text{H}_2\text{O}(\text{l})$ | 0.5285 |
| $\text{Rh}^{3+} + 3\text{e}^- = \text{Rh}$                                                                 | 0.6    |
| $\text{Ag}^+ + \text{e}^- = \text{Ag}$                                                                     | 0.7991 |
| $\text{Pd}^{2+} + 2\text{e}^- = \text{Pd}$                                                                 | 0.951  |
| $\text{Pt}^{4+} + 4\text{e}^- = \text{Pt}$                                                                 | 1.118  |
| $\text{Ir}^{3+} + 3\text{e}^- = \text{Ir}$                                                                 | 1.156  |
| $\text{Au}^{3+} + 3\text{e}^- = \text{Au}$                                                                 | 1.52   |

---

**Table S5. Thermodynamical data of pure substances**

| Substance                      | $\Delta_f H_m^\ominus$<br>(kJ·mol <sup>-1</sup> ) | $S_m^\ominus$<br>(J·mol <sup>-1</sup> ·K <sup>-1</sup> ) | Substance                      | $\Delta_f H_m^\ominus$<br>(kJ·mol <sup>-1</sup> ) | $S_m^\ominus$<br>(J·mol <sup>-1</sup> ·K <sup>-1</sup> ) |
|--------------------------------|---------------------------------------------------|----------------------------------------------------------|--------------------------------|---------------------------------------------------|----------------------------------------------------------|
| H <sub>2</sub>                 | 0                                                 | 130.680                                                  | H <sub>2</sub> O (g)           | -241.826                                          | 188.959                                                  |
|                                |                                                   |                                                          | H <sub>2</sub> O(l)            | -285.83                                           | 69.950                                                   |
| Ag                             | 0                                                 | 42.677                                                   | Ag <sub>2</sub> O              | -31.049                                           | 121.298                                                  |
| As                             | 0                                                 | 35.706                                                   | As <sub>2</sub> O <sub>3</sub> | -654.796                                          | 117.001                                                  |
| Au                             | 0                                                 | 47.497                                                   | Au <sub>2</sub> O <sub>3</sub> | -3.347                                            | 130.332                                                  |
| Bi                             | 0                                                 | 56.735                                                   | Bi <sub>2</sub> O <sub>3</sub> | -573.883                                          | 151.499                                                  |
| C(s)                           | 0                                                 | 5.740                                                    | CH <sub>4</sub>                | -74.387                                           | 186.214                                                  |
| CO                             | -110.541                                          | 197.661                                                  | CO <sub>2</sub>                | -393.505                                          | 213.77                                                   |
| Cd                             | 0                                                 | 51.798                                                   | CdO                            | -258.99                                           | 54.810                                                   |
| Co                             | 0                                                 | 30.041                                                   | Co <sub>3</sub> O <sub>4</sub> | -910.02                                           | 114.307                                                  |
| CoO                            | -237.944                                          | 52.969                                                   | Cu                             | 0                                                 | 33.164                                                   |
| CuO                            | -156.063                                          | 42.593                                                   | Fe                             | 0                                                 | 27.28                                                    |
| Fe <sub>2</sub> O <sub>3</sub> | -824.248                                          | 87.404                                                   | Fe <sub>3</sub> O <sub>4</sub> | -1118.383                                         | 146.147                                                  |
| Ga                             | 0                                                 | 40.828                                                   | Ga <sub>2</sub> O <sub>3</sub> | -1089.095                                         | 84.977                                                   |
| Hg                             | 0                                                 | 65.898                                                   | HgO                            | -90.789                                           | 70.27                                                    |
| In                             | 0                                                 | 57.823                                                   | In <sub>2</sub> O <sub>3</sub> | -929.789                                          | 104.198                                                  |
| Ir                             | 0                                                 | 35.505                                                   | IrO <sub>2</sub>               | -242.672                                          | 58.948                                                   |
| Ni                             | 0                                                 | 29.874                                                   | NiO                            | -239.701                                          | 37.991                                                   |
| Os                             | 0                                                 | 32.635                                                   | OsO <sub>4</sub>               | -394.099                                          | 143.900                                                  |

---

|                                 |          |         |                                 |          |         |
|---------------------------------|----------|---------|---------------------------------|----------|---------|
| OsO <sub>2</sub>                | -294.972 | 51.882  |                                 |          |         |
| Pb                              | 0        | 64.785  | PbO <sub>2</sub>                | -274.47  | 71.797  |
| Pb <sub>3</sub> O <sub>4</sub>  | -718.686 | 211.961 | PbO                             | -218.062 | 68.999  |
| Pd                              | 0        | 37.823  | PdO                             | -115.478 | 38.911  |
| Pt                              | 0        | 51.631  | PtO <sub>2</sub>                | 170.707  | 259.517 |
| Rh                              | 0        | 31.505  | Rh <sub>2</sub> O <sub>3</sub>  | -355.64  | 106.274 |
| Ru                              | 0        | 28.535  | RuO <sub>2</sub>                | -305.014 | 58.158  |
| Sb                              | 0        | 45.522  | Sb <sub>2</sub> O <sub>3</sub>  | -720.305 | 110.449 |
| Se                              | 0        | 42.258  | SeO <sub>2</sub>                | -225.350 | 66.693  |
| Sn                              | 0        | 51.195  | SnO <sub>2</sub>                | -580.823 | 52.342  |
| Te                              | 0        | 32.056  | TeO <sub>2</sub>                | -323.423 | 74.057  |
| Ag <sub>2</sub> Se              | -37.999  | 150.712 | Ag <sub>2</sub> Te              | -35.982  | 153.553 |
| Bi <sub>2</sub> Se <sub>3</sub> | -140.164 | 239.743 | Bi <sub>2</sub> Te <sub>3</sub> | -77.404  | 260.914 |
| CdSe                            | -144.766 | 83.262  | CdTe                            | -101.797 | 92.885  |
| CuSe                            | -41.84   | 78.241  | CuTe                            | -25.104  | 86.609  |
| Cu <sub>2</sub> Sb              | -12.134  | 126.482 | Ga <sub>2</sub> Te <sub>3</sub> | -274.889 | 213.384 |
| In <sub>2</sub> Te <sub>3</sub> | -191.627 | 234.304 | Ni <sub>3</sub> Sn              | -93.701  | 131.378 |
| NiTe <sub>1.1</sub>             | -58.158  | 84.057  | NiSe <sub>2</sub>               | -108.784 | 103.512 |
| Sb <sub>2</sub> Se <sub>3</sub> | -127.612 | 212.129 | Sb <sub>2</sub> Te <sub>3</sub> | -56.484  | 246.438 |
| SnSe                            | -115.397 | 89.539  | SnTe                            | -61.923  | 99.998  |

---

$\Delta_f H_m^\ominus$ : standard enthalpy change, and  $S_m^\ominus$ : standard entropy



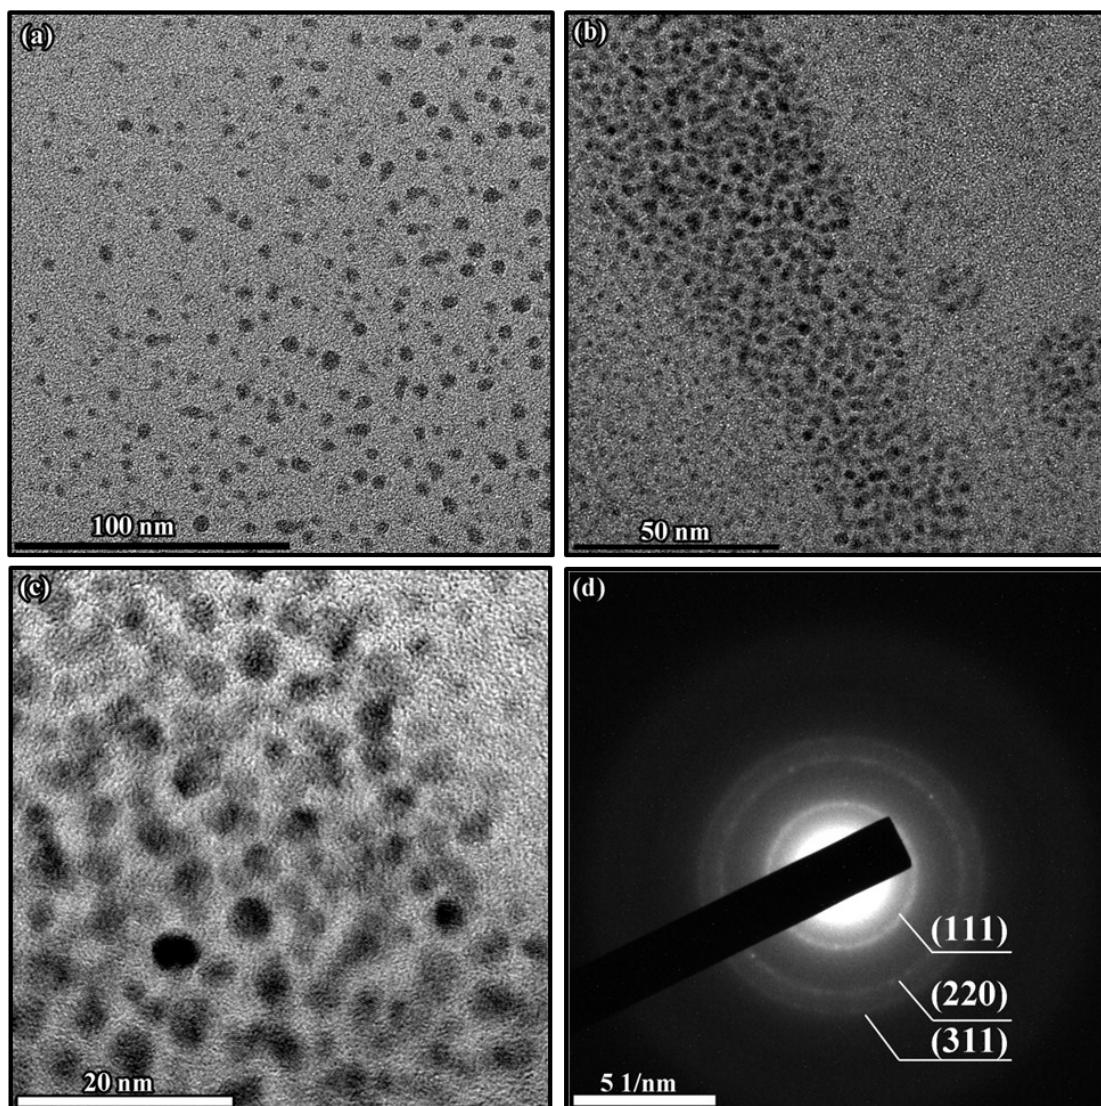

**Figure S1.** TEM analysis results of CdTe NCs being calcined at 723 K by using gelatin as bonding agent and EG as solvent.

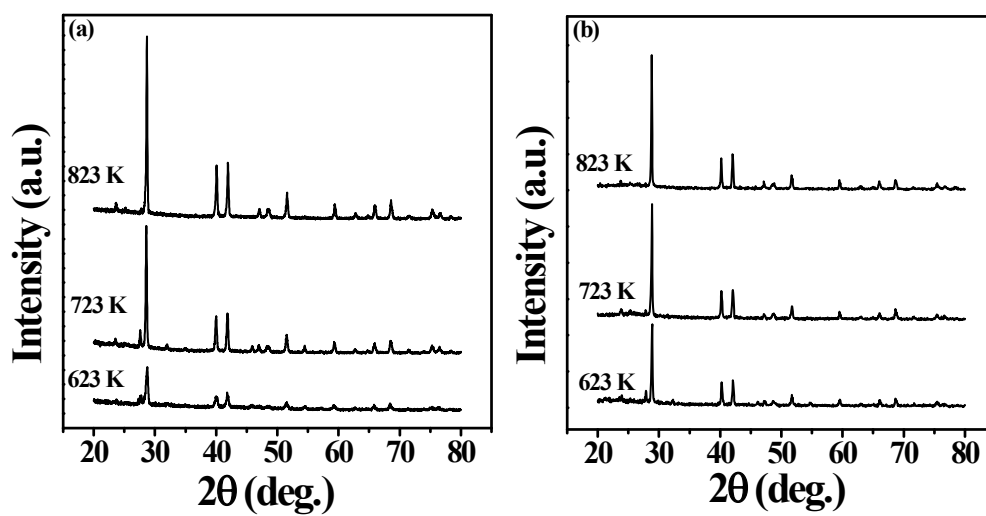

**Figure S2.** XRD profiles of Sb products being calcined at different temperatures by using CA (a) and gelatin (b) as bonding agent.

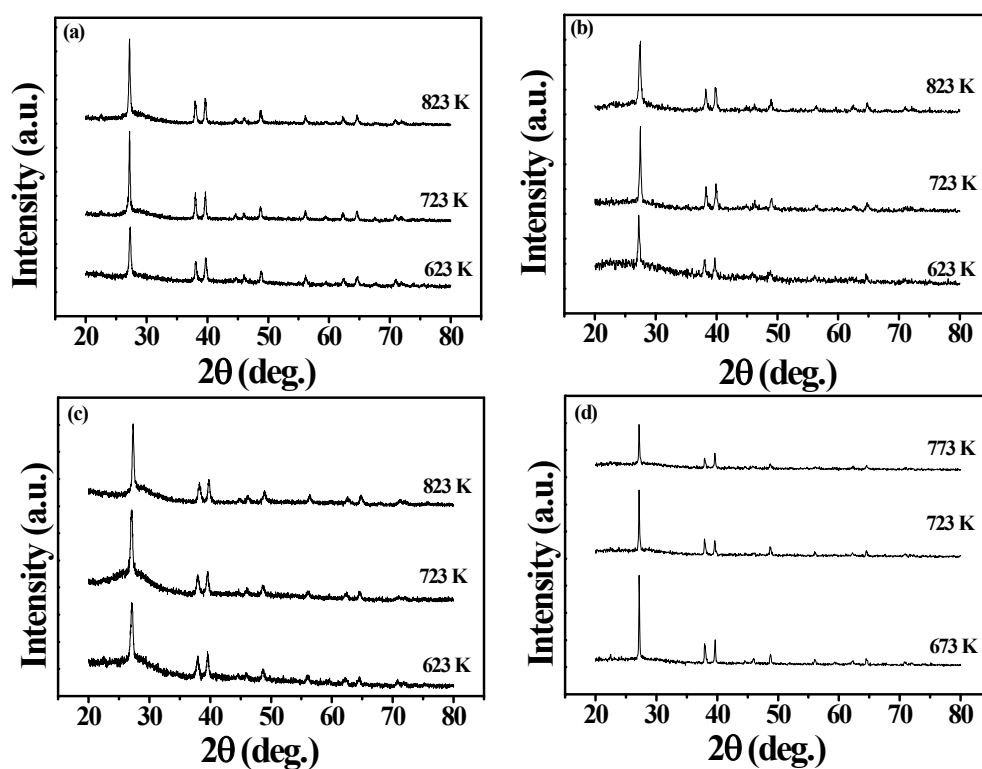

**Figure S3.** XRD profiles of Bi products being calcined at different temperatures by using CA (a), gelatin (b), acrylamide (c), and glucose (d) as bonding agent. The solvents are EG (a-c) and DW (d), respectively.

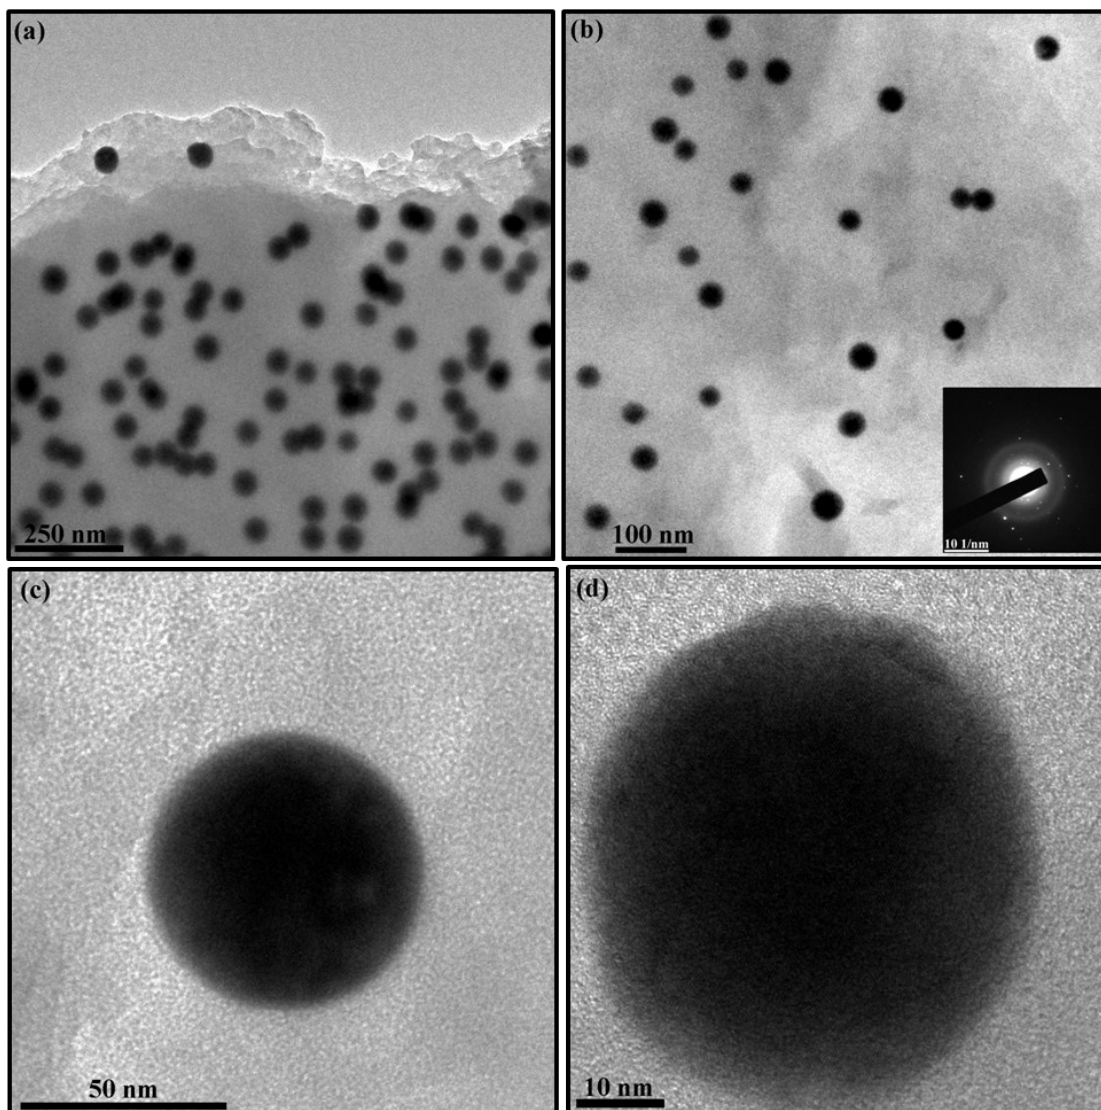

**Figure S4.** TEM images of Bi NCs being calcined at 723 K by using acrylamide as bonding agent, PVP as surfactant and EG as solvent.

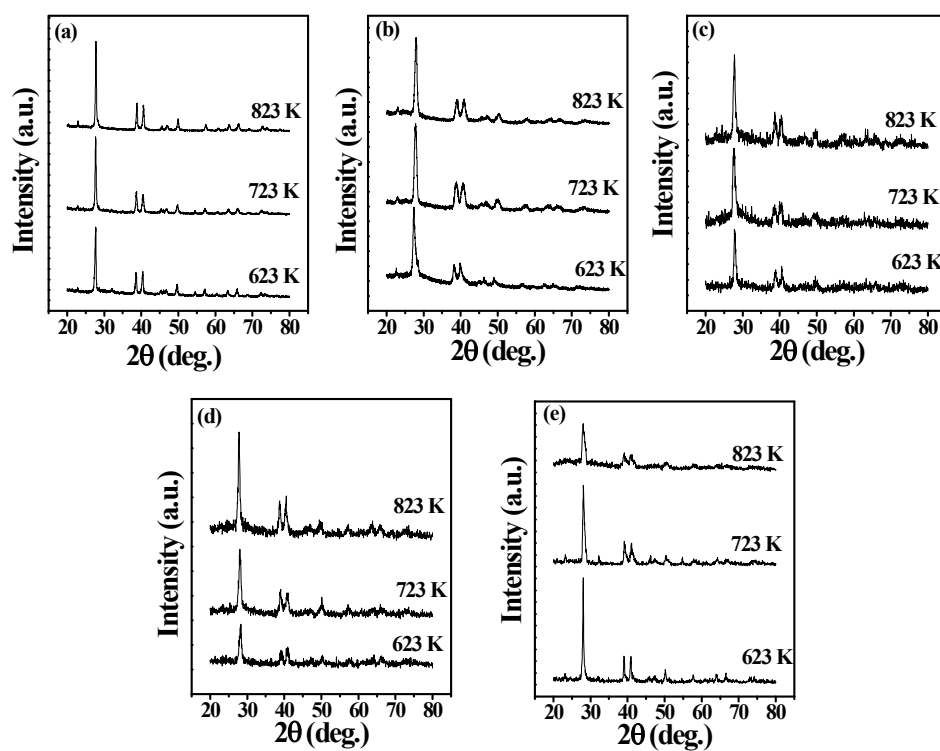

**Figure S5.** XRD patterns of Bi-Sb solid solution products by using CA (a, d, e) and gelatin (b, c) as bonding agents, PVP as surfactant and EG as solvent. The atomic ratio of Bi:Sb in the solid solution NCs with initial atomic ratio of 50:50 is 49.92:50.08 as determined by XRF, which is close to the starting composition.

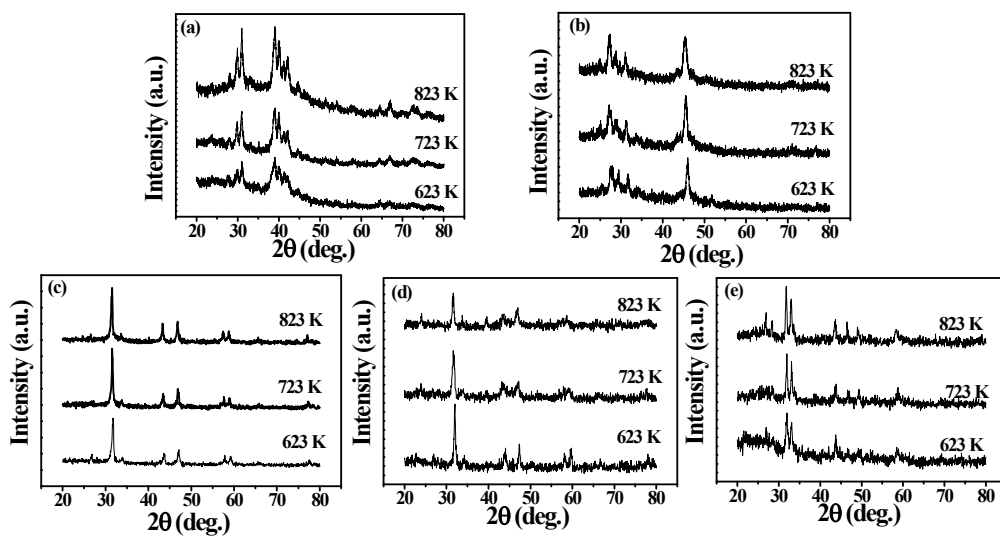

**Figure S6.** XRD profiles of  $\text{Ag}_2\text{Te}$  (a),  $\text{CuTe}$  (b),  $\text{NiTe}_{1.5}$  (c and d),  $\text{CoTe}_{1.5}$  (e) products where the solvents for  $\text{NiTe}_{1.5}$  products are DW (c) and EG (d), respectively.

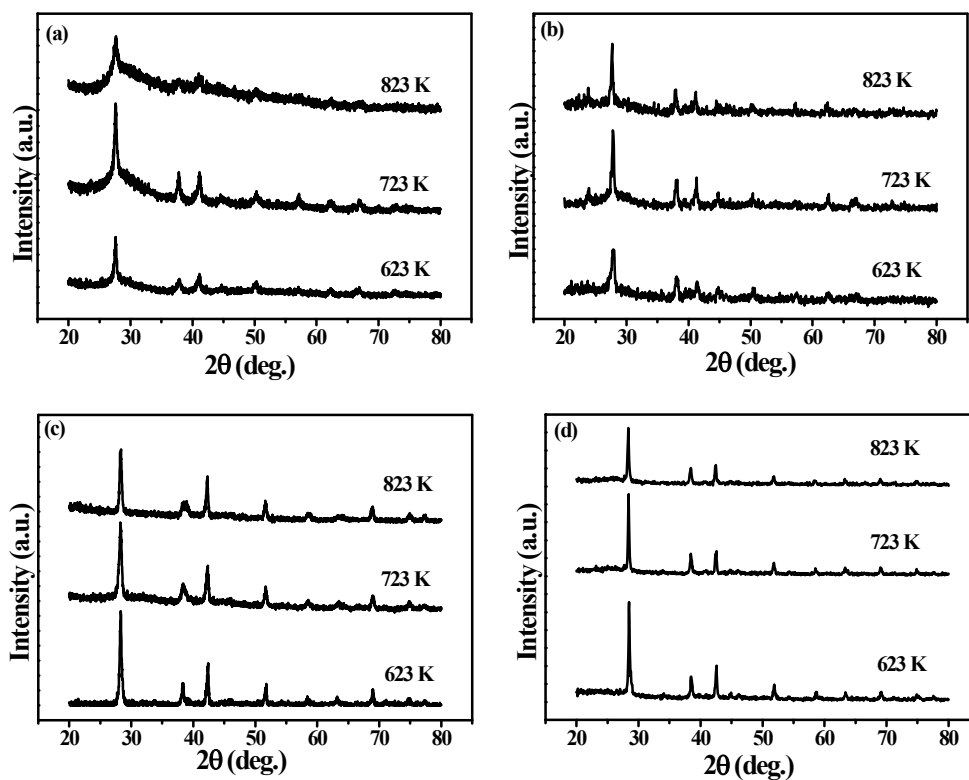

**Figure S7.** XRD profiles of  $\text{Bi}_2\text{Te}_3$  (a, b) and  $\text{Sb}_2\text{Te}_3$  (c, d) products by employing CA (a, c) and gelatin (b, d) as bonding agents.

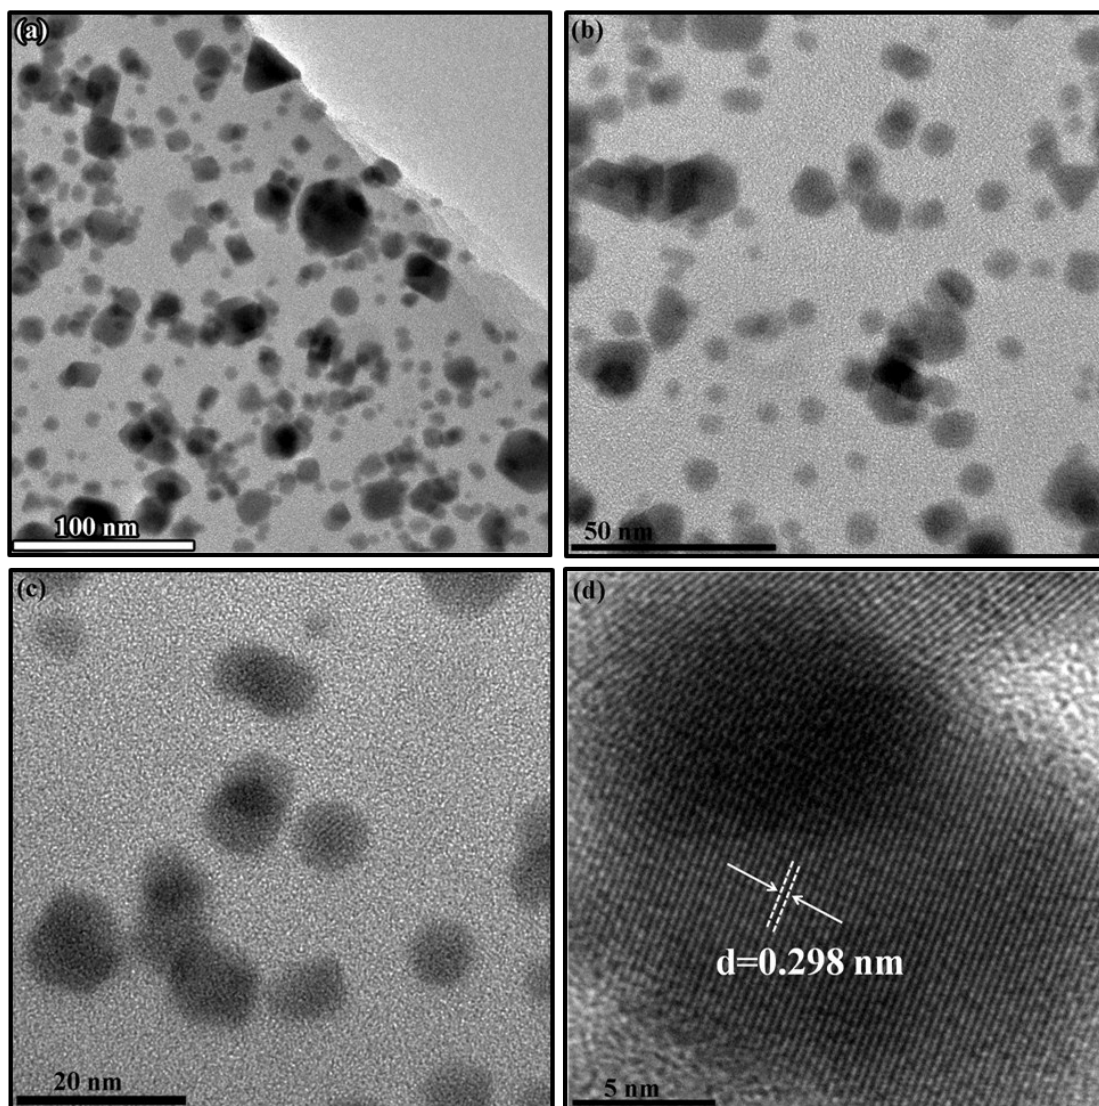

**Figure S8.** TEM images of  $\text{Ag}_2\text{Te}$  NCs being calcined at 823 K under  $\text{N}_2$  protecting atmosphere.

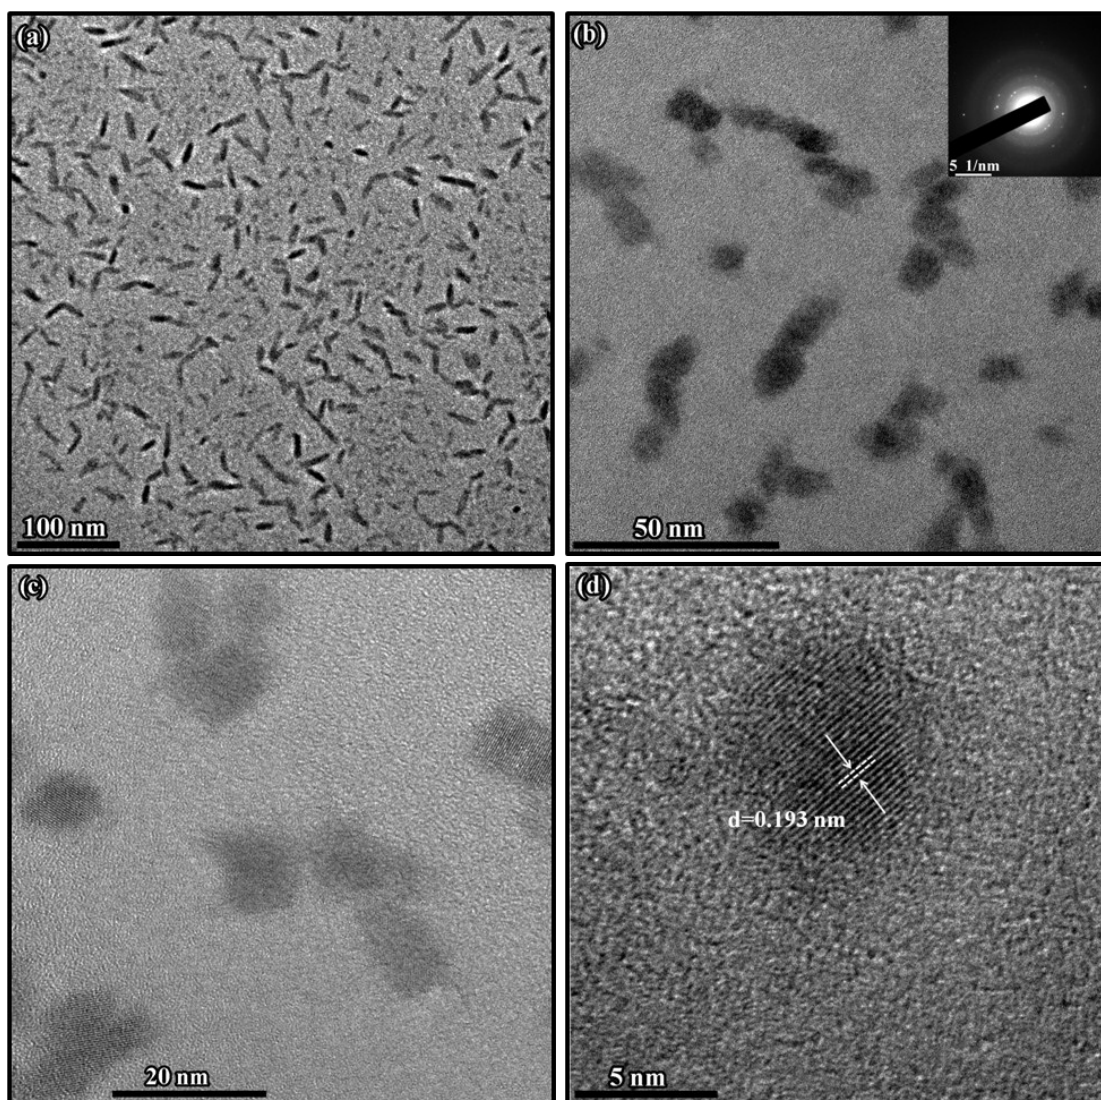

**Figure S9.** TEM images of NiTe<sub>1.5</sub> NCs being calcined at 823 K under N<sub>2</sub> protecting atmosphere.



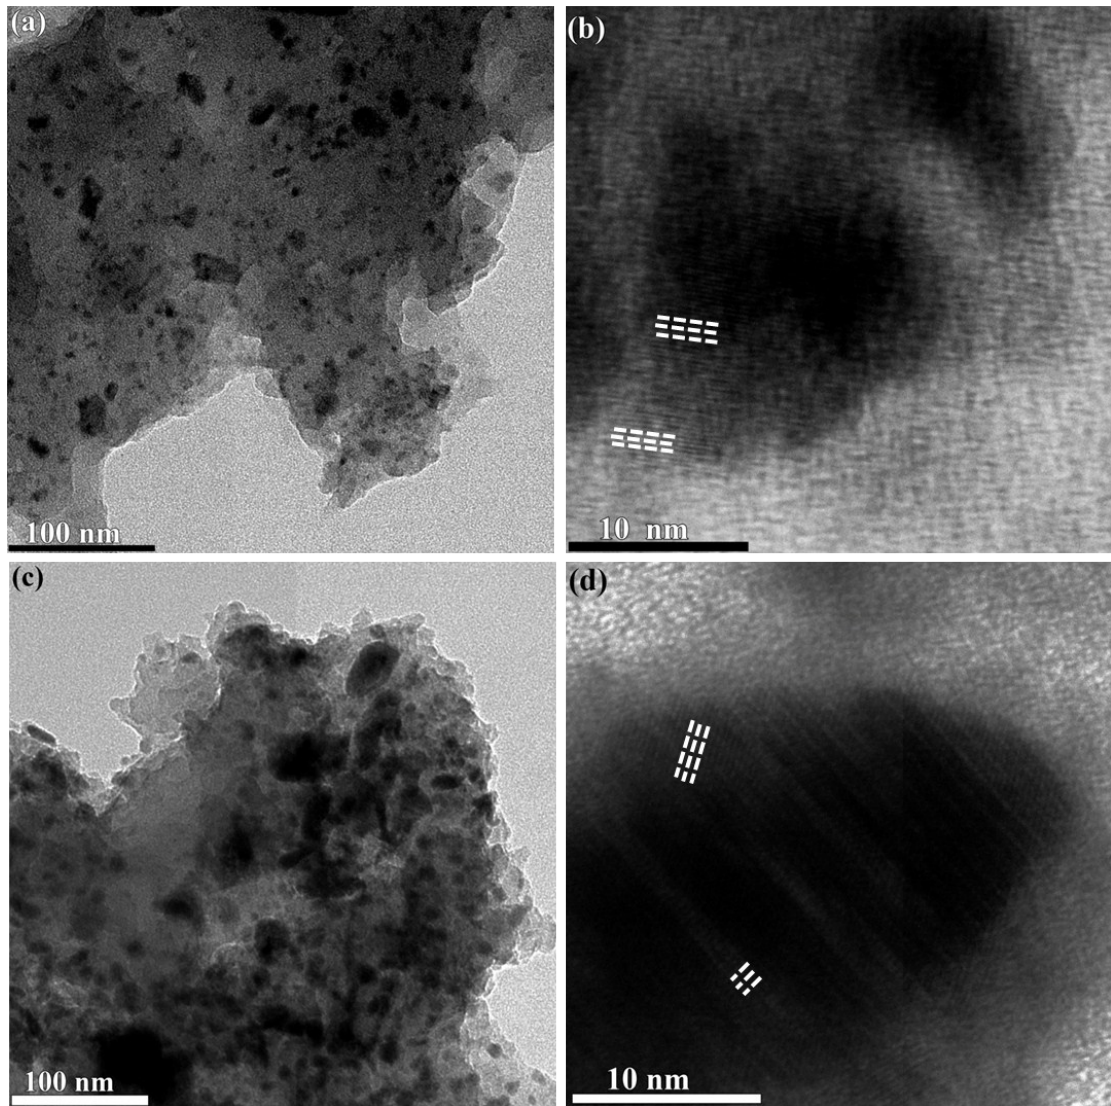

**Figure S10.** TEM images of  $\text{Sb}_2\text{Te}_3$  (a, b),  $\text{Bi}_2\text{Te}_3$  (c, d) NCs being calcined at 723 K under  $\text{N}_2$  protecting atmosphere by using CA as bonding agent.

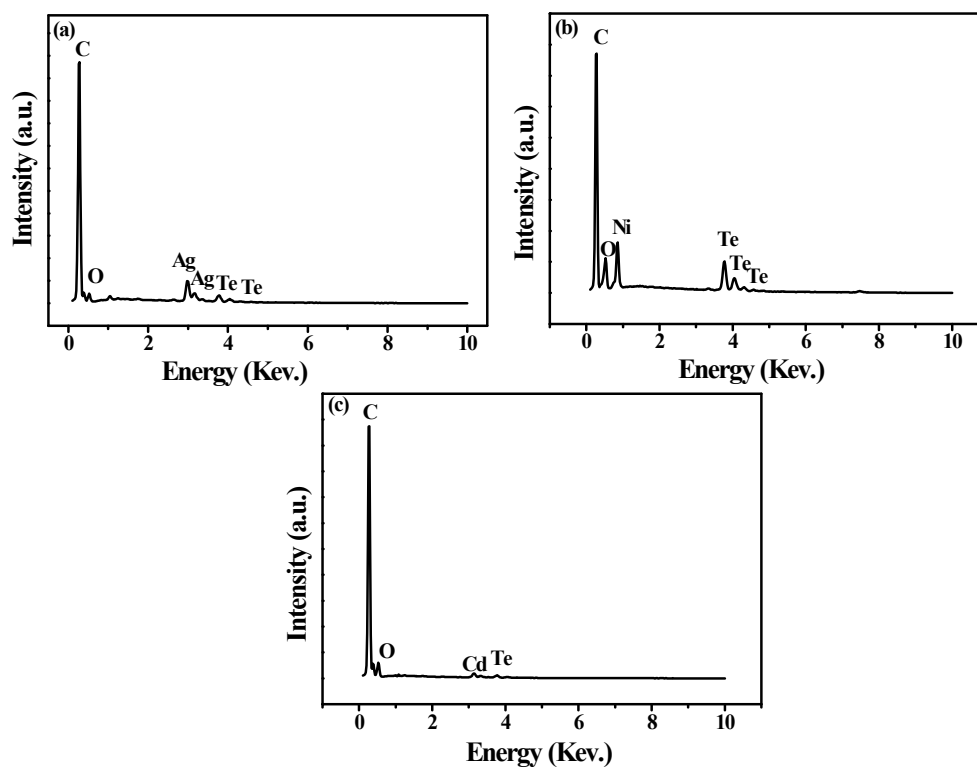

**Figure S11.** EDX analysis results of Ag<sub>2</sub>Te (a) and NiTe<sub>1.5</sub> (b) products being calcined at 823 K, and CdTe (c) product being calcined at 723 K. The solvents are DW (a, b), EG (c) and bonding agents are gelatin (a), CA (b), gelatin (c) for Ag<sub>2</sub>Te, NiTe<sub>1.5</sub> and CdTe, respectively.

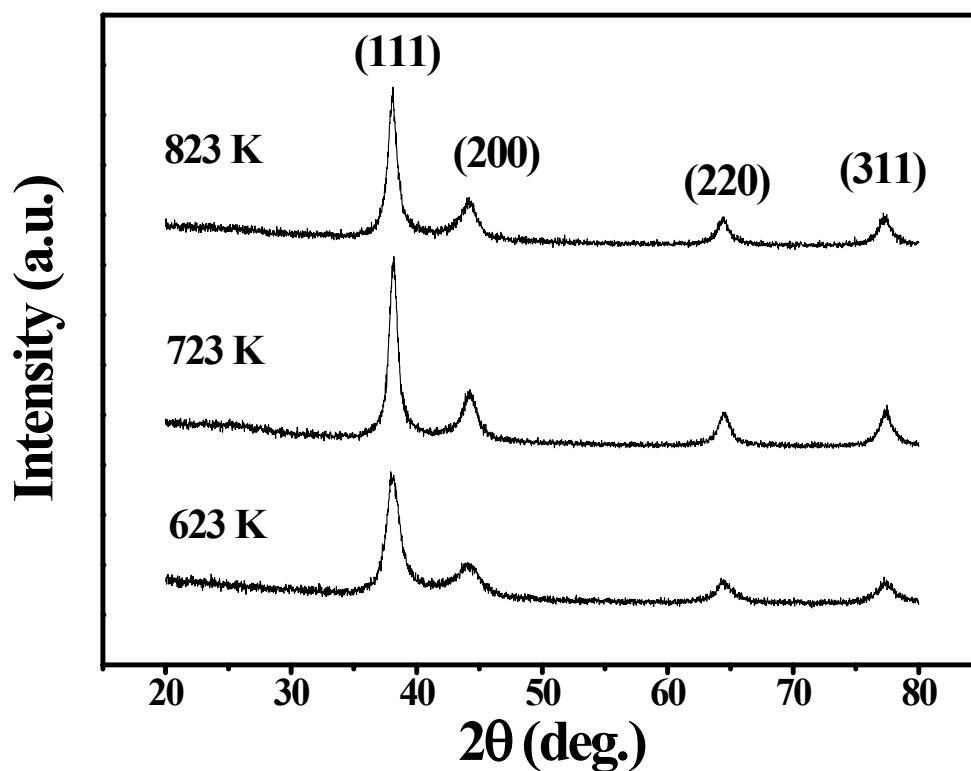

**Figure S12.** XRD patterns Ag NCs being calcined at different temperatures by using DW as solven, gelatin as bonding agent.

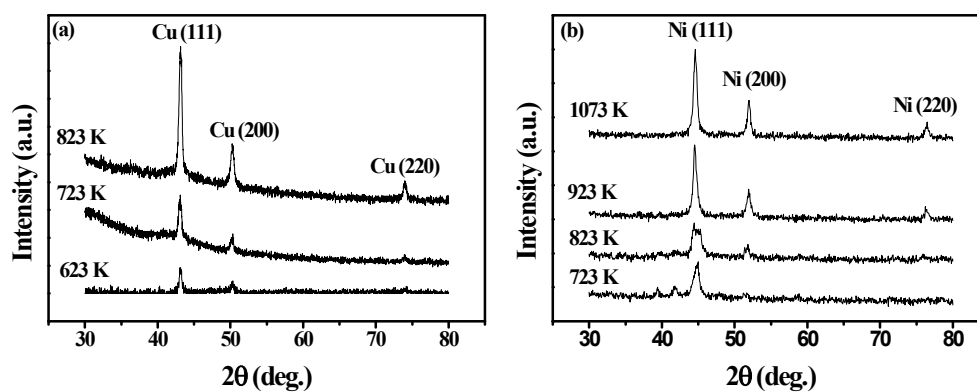

**Figure S13.** XRD patterns of Cu and Ni NCs being calcined at different temperatures by using gelatin as bonding agent.

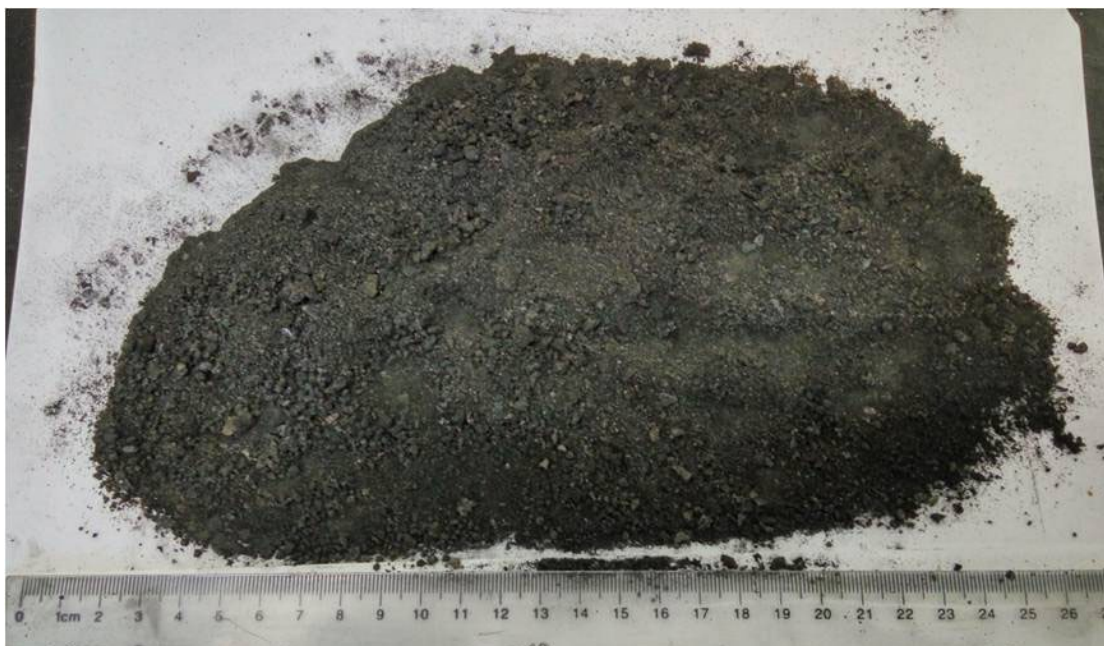

**Figure S14.** Image of Ni NCs being calcined at 1073 K by using gelatin as bonding agent, PVP as surfactant and de-ionized water as solvent. The total weight of the final product is 16.53 g. This product contains metallic Ni NCs and supporting material, which is considered to be amorphous carbon. Then a certain selected part of the product has been calcined at 1473 K in air to transform the Ni NCs completely to NiO and to eliminate amorphous carbon. From the mass of NiO and the mass of the selected product, the mass of Ni NCs in the product being calcined at 1073 K can then be calculated to be 4.8 g, meaning that this method can prepare Ni NCs in large scale. The yield of nickel can then be determined to be 97.1% from the initial mass of nickel nitrate and the final mass of NiO.

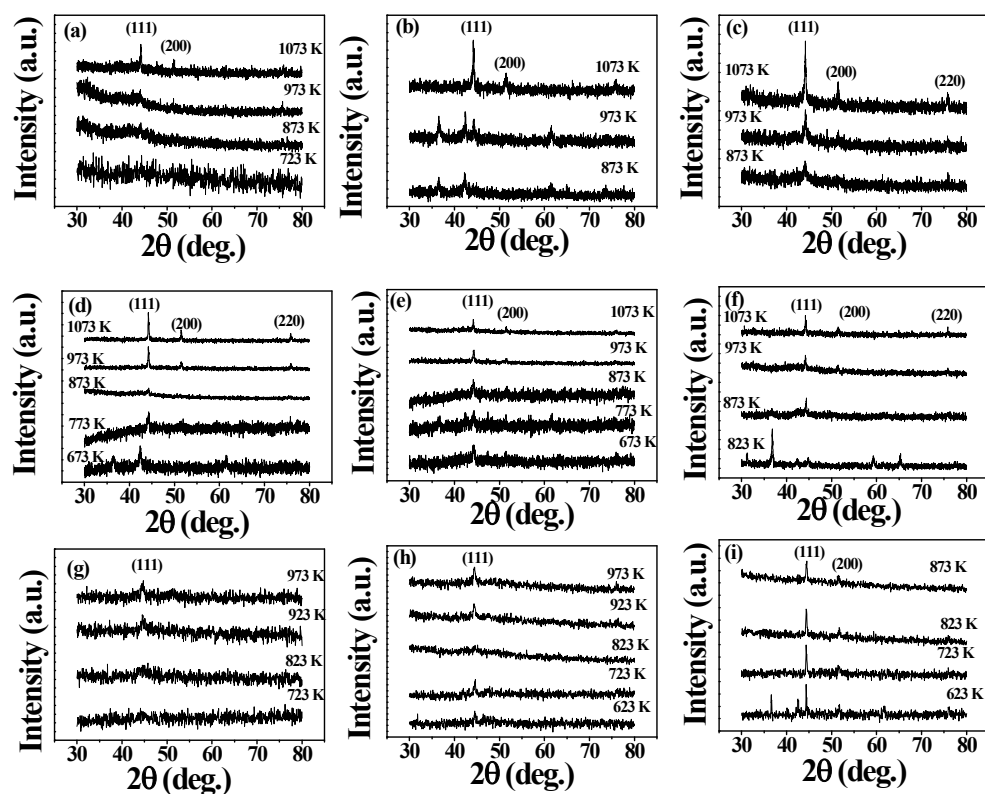

**Figure S15.** XRD analysis results of Co products being calcined at different temperatures by using cobalt nitrate, PVP, DW, and CA (a), starch (b), EDTA (c), ascorbic acid (d), glucose (e), sucrose (f), lactose (g), EG (h, i). The molar concentration ratios of  $\text{Co}^{2+}$ : EG are 1: 1 and 1: 2 for (h) and (i).

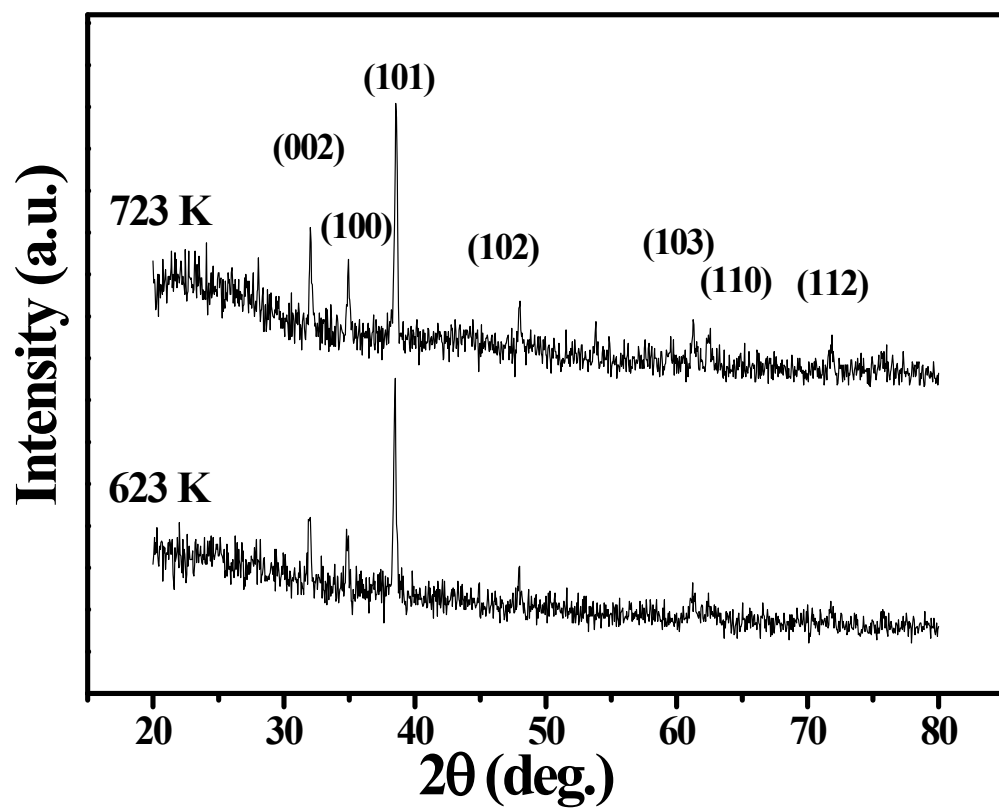

**Figure S16.** XRD patterns of Cd products by using  $\text{Cd}(\text{CH}_3\text{COO})_2 \cdot 3\text{H}_2\text{O}$ , glucose, PVP and DW as raw materials.

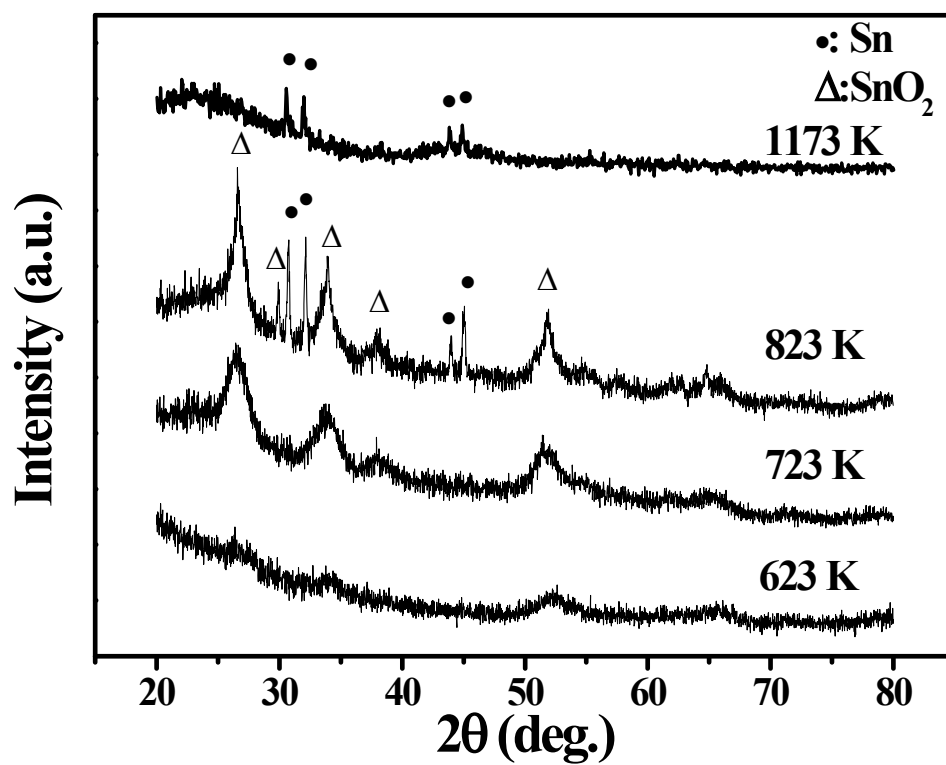

**Figure S17.** XRD patterns of the products by using SnCl<sub>4</sub>·4H<sub>2</sub>O, glucose, PVP and DW as raw materials.

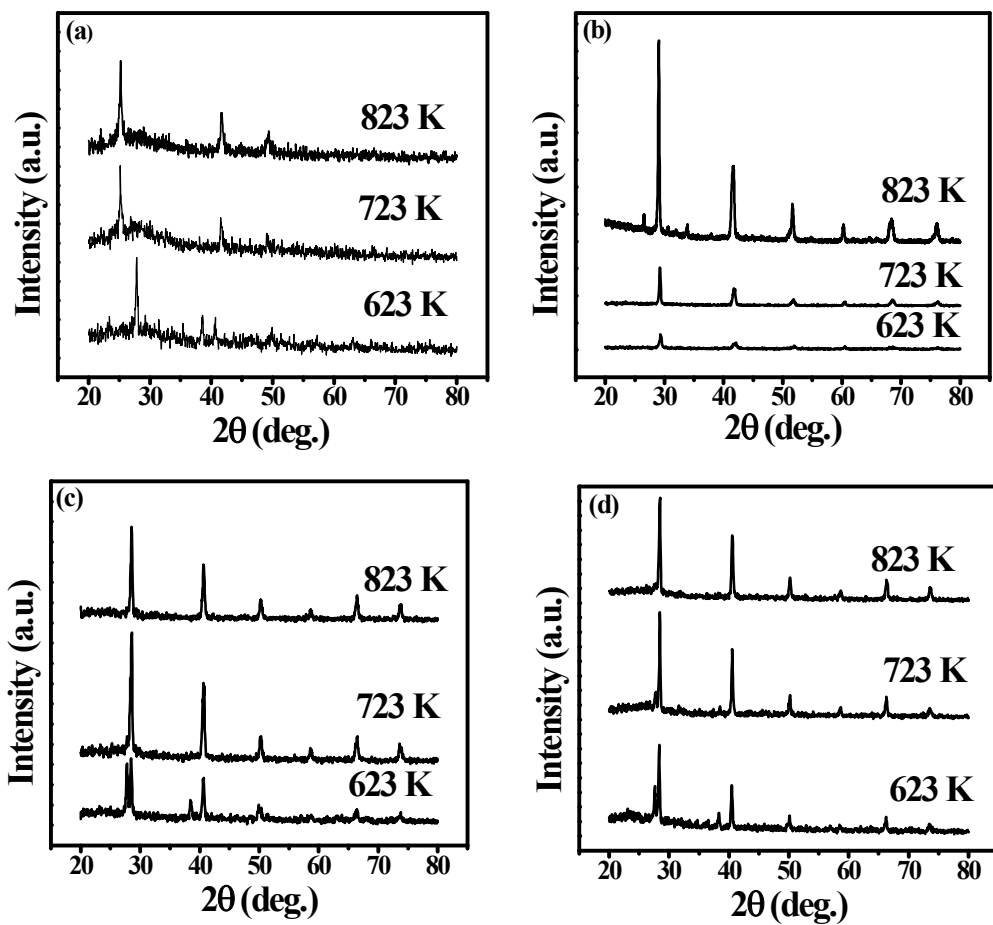

Fi

**Figure S18.** XRD patterns of  $\text{In}_2\text{Te}_3$  (a),  $\text{SnSb}$  (b),  $\text{SnTe}$  (c, d) products being calcined at different temperatures where the bonding agents are CA (a-c) and gelatin (d) and solvents are DW (a, c, d) and EG (b).



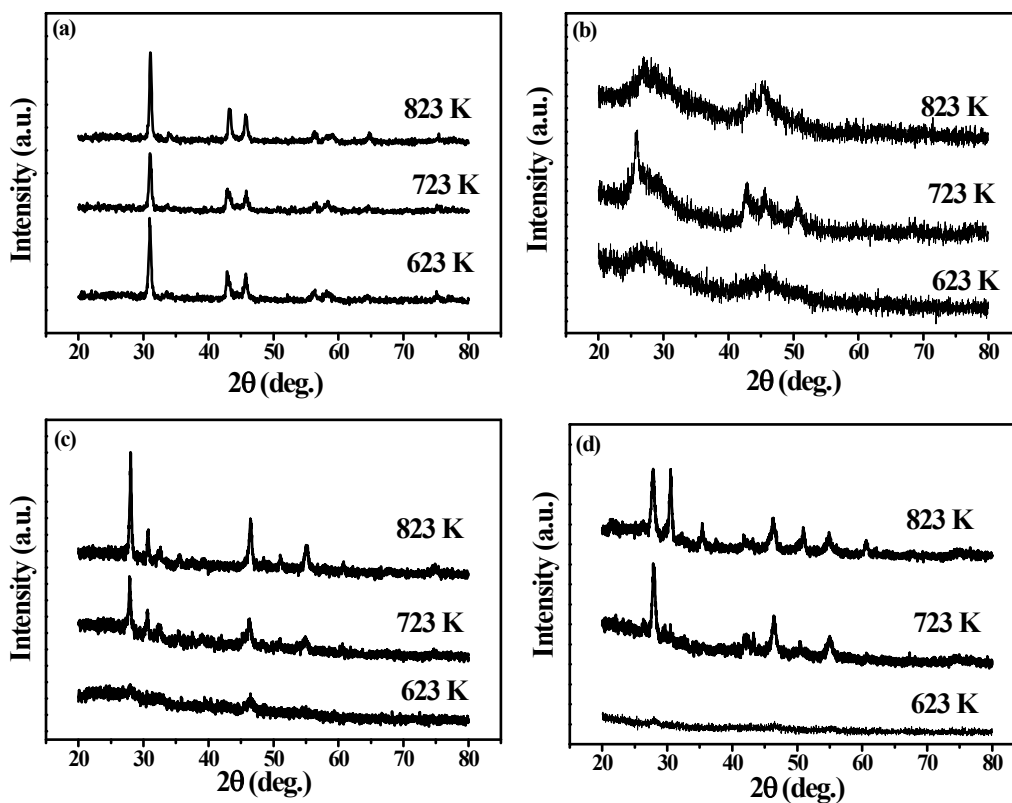

**Figure S19.** XRD analysis results of  $\text{Ni}_{2.9}\text{SnTe}_2$  (a),  $\text{CuGaTe}_2$  (b),  $\text{CuInS}_2$  (c and d) products. The solvents are DW (a-c), EG (d) and the bonding agents are CA (a, b, d), and EDTA (c), respectively.

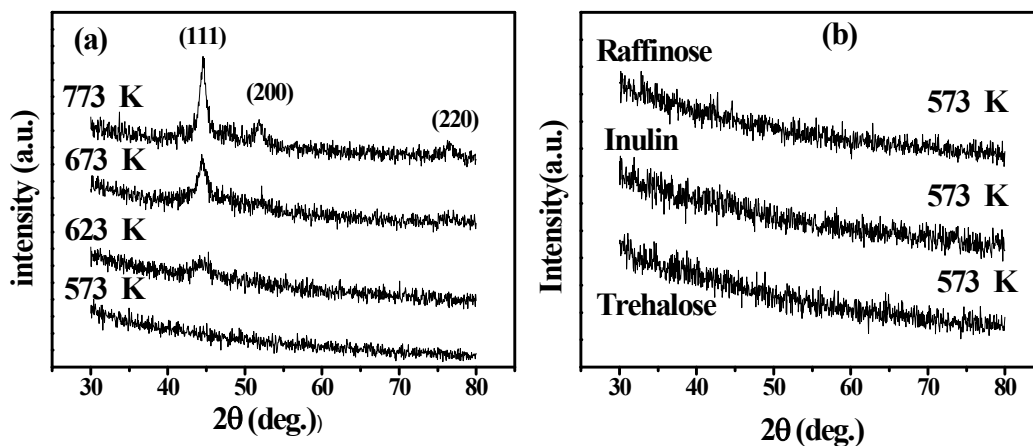

**Figure S20.** XRD patterns of the products being calcined at different temperatures by using  $\text{Ni}(\text{NO}_3)_2 \cdot 6\text{H}_2\text{O}$ , PVP, DW and Arabinose (a), Trehalose (b), Inulin (b), Raffinose (b).

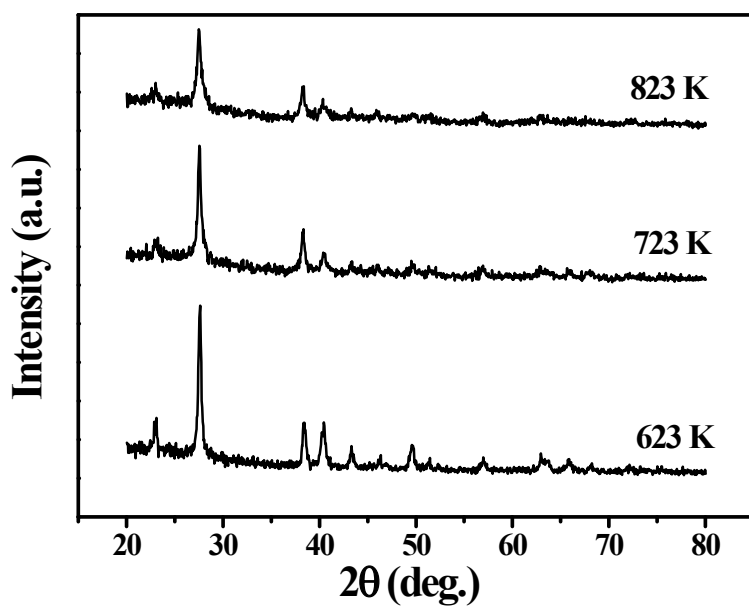

**Figure S21.** XRD analysis results of Te products by using  $\text{H}_6\text{TeO}_6$  as Te source, Coca-Cola as bonding agent, PVP as surfactant and DW as solvent.

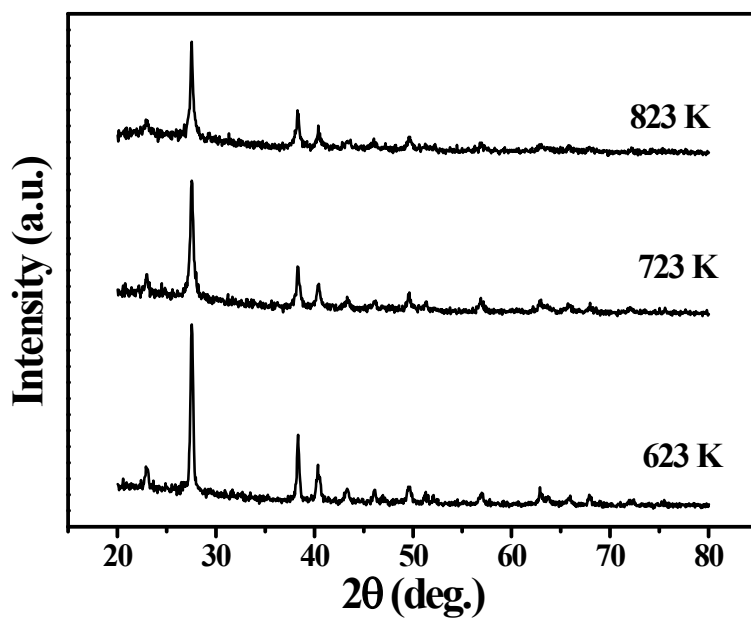

**Figure S22.** XRD analysis results of Te products by using  $\text{H}_6\text{TeO}_6$  as Te source, sprite as bonding agent, PVP as surfactant and DW as solvent.
